# Supplementary material for: Lactobacillus reuteri JCM 1112 ameliorates chronic acrylamide-induced glucose metabolism disorder via the bile acid–TGR5–GLP-1 axis and modulates intestinal oxidative stress in mice
Source: Royal Society of Chemistry journal article supplement (doi:10.1039/d4fo01061b), 2024-01-01
Supplement: d4fo01061b1.pdf [file d4fo01061b1.pdf]

### Supplementary Materials

***Lactobacillus reuteri* JCM 1112 ameliorates chronic acrylamide-induced glucose metabolism disorder via bile acids-TGR5-GLP-1 axis and modulates intestinal oxidative stress in mice<sup>1</sup>**

Zonghao Yue<sup>a</sup>, Feiyue Zhao<sup>a</sup>, Yuqi Guo<sup>a</sup>, Yidan Zhang<sup>a</sup>, Yanjuan Chen<sup>b</sup>, Le He<sup>a</sup>, Lili Li<sup>a,\*</sup>

<sup>a</sup> College of Life Sciences and Agronomy, Zhoukou Normal University, Zhoukou 466001, China

<sup>b</sup> School of Mechanical and Electrical Engineering, Zhoukou Normal University, Zhoukou 466001, China

---

\* Corresponding authors at: College of Life Sciences and Agronomy, Zhoukou Normal University, Zhoukou 466001, China (L. Li).

Email addresses: [lilili@zknv.edu.cn](mailto:lilili@zknv.edu.cn) (L. Li).

## **Supplementary Methods**

### **1. UPLC-MS/MS analysis**

UPLC-MS/MS was performed using an Agilent 1290 Infinity LC system (Agilent, Santa Clara, USA) coupled with an AB SCIEX QTRAP 5500 mass spectrometer (AB Sciex, Framingham, USA). The Agilent 1290 Infinity LC system was equipped with an ACQUITY UPLC BEH C18 column (100 mm × 2.1 mm i.d., 1.8 μm; Waters, Milford, USA). The column oven temperature was set to 45 °C. The mobile phases consisted of 0.1% formic acid in water (A) and methanol (B). The injection volume was 2 μL and the flow rate was 0.25 mL/min. The gradient elution conditions of mobile phases were as follows: 50% to 70% of B at 0-7 min; 70% to 90% of B at 7-15 min; 90% B maintained at 15-17 min; 90% to 60% of B at 17-17.1 min, 60% B maintained at 17.1-20 min. The MS analysis was performed in negative ion mode using an AB SCIEX QTRAP 5500 system equipped with electron spray ionization (ESI). The ESI source conditions were set as follows: source temperature, 550 °C; ion source Gas1 (Gas1), 55 psi; ion source Gas2 (Gas2), 55 psi; curtain gas (CUR), 40 psi; and ion spray voltage floating (ISVF), -4500 V. The MRM mode was used for the acquisition of MS data. In addition, equal volumes of all samples were mixed to generate quality control (QC) samples, which were used to evaluate the stability and repeatability of the method.

### **2. Reverse transcription and qPCR assay**

Reverse transcription of the total RNA (1 μg) was performed using HiScript II Q RT SuperMix Kit (Vazyme). qPCR was run in a CFX96 Touch™ Real-Time PCR System (BioRad, Hercules, USA) using ChamQ SYBR qPCR Master Mix Kit (Vazyme). The

reaction conditions were set as follows: 95 °C for 30 s, 40 cycles of 10 s at 95 °C and 30 s at 60 °C, followed by melting curve analysis.

**Supplementary tables**

**Table S1** The compositions of SPF-grade standard diet

| <b>Component</b>                  | <b>Content</b> |                | <b>Component</b>  | <b>Content</b> |                    | <b>Component</b>              | <b>Content</b> |
|-----------------------------------|----------------|----------------|-------------------|----------------|--------------------|-------------------------------|----------------|
| Vitamin A (IU/kg)                 | 20000.00       |                | Sodium (g/kg)     | 2.83           |                    | Methionine+Cysteine (g/kg)    | 8.00           |
| Vitamin D (IU/kg)                 | 1667.00        |                | Magnesium (g/kg)  | 2.77           |                    | Lysine (g/kg)                 | 13.90          |
| Vitamin E (mg/kg)                 | 182.00         |                | Potassium (g/kg)  | 8.20           |                    | Tryptophan (g/kg)             | 2.50           |
| Vitamin K (mg/kg)                 | 8.00           |                | Copper (mg/kg)    | 12.41          |                    | Arginine (g/kg)               | 12.00          |
| Vitamin B1 (mg/kg)                | 20.23          | <b>Mineral</b> | Iron (mg/kg)      | 158.60         | <b>Amino acids</b> | Leucine (g/kg)                | 17.60          |
| Vitamin B2 (mg/kg)                | 20.00          |                | Manganese (mg/kg) | 88.10          |                    | Isoleucine (g/kg)             | 10.50          |
| <b>Vitamin</b> Vitamin B6 (mg/kg) | 15.00          |                | Zinc (mg/kg)      | 50.70          |                    | Threonine (g/kg)              | 8.80           |
| Vitamin B12 (mg/kg)               | 0.03           |                | Selenium (mg/kg)  | 0.20           |                    | Valine (g/kg)                 | 11.90          |
| Niacin (mg/kg)                    | 70.00          |                | Iodine (mg/kg)    | 0.90           |                    | Histidine (g/kg)              | 5.60           |
| Pantothenic acid (mg/kg)          | 25.00          |                |                   |                |                    | Phenylalanine+tyrosine (g/kg) | 16.80          |
| Biotin (mg/kg)                    | 0.30           |                |                   |                |                    |                               |                |
| Choline (mg/kg)                   | 1250.00        |                |                   |                |                    |                               |                |
| Folic acid (mg/kg)                | 10.00          |                |                   |                |                    |                               |                |

**Table S2** the primer sequences for qPCR assay

| Gene name        | Primer sequence (5'–3') | Reference             |
|------------------|-------------------------|-----------------------|
| TGR5-F           | TATGGAGCCGGAACCATCAG    |                       |
| TGR5-R           | GGCAAGCAGGGAAAGGAAAC    |                       |
| FXR-F            | CCTCCTCGTCTTACTATTCC    | Liu et al., 2022      |
| FXR-R            | GTCACAGGCATCTCTGATAC    |                       |
| $\beta$ -actin-F | GGCTGTATTCCCCTCCATCG    |                       |
| $\beta$ -actin-R | CCAGTTGGTAACAATGCCATGT  |                       |
| PG-F             | GATCATTCCCAGCTTCCCAG    | Trabelsi et al., 2015 |
| PG-R             | CTGGTAAAGGTCCCTTCAGC    |                       |

**Reference**

Liu, X., Zhang, Y., Li, W., Zhang, B., Yin, J., Liuqi, S., Wang, J., Peng, B., Wang, S., 2022.

Fucoidan ameliorated dextran sulfate sodium-induced ulcerative colitis by modulating gut microbiota and bile acid metabolism. *J Agric Food Chem.* 70, 14864–14876.

Trabelsi, M. S., Daoudi, M., Prawitt, J., Ducastel, S., Touche, V., Sayin, S. I., Perino, A., Brighton, C. A., Sebti, Y., Kluza, J., Briand, O., Dehondt, H., Vallez, E., Dorchies, E., Baud, G., Spinelli, V., Hennuyer, N., Caron, S., Bantubungi, K., Caiazzo, R., ... Lestavel, S. (2015). Farnesoid X receptor inhibits glucagon-like peptide-1 production by enteroendocrine L cells. *Nat Commun.* 6, 7629.

## Supplementary figures

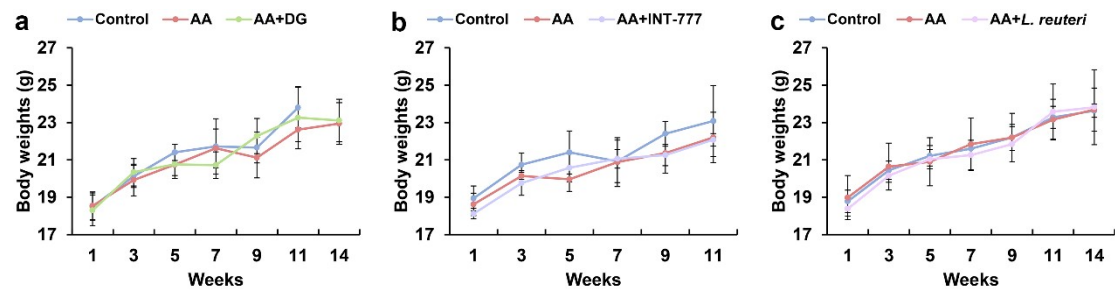

Fig. S1 Body weights of mice in animal experiment I (a), II (b) and III (c).

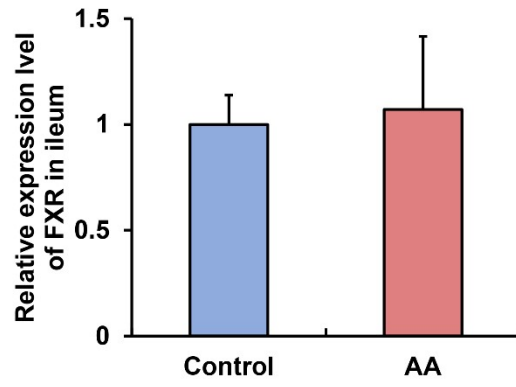

**Fig. S2** The effect of chronic low-dose AA exposure on ileum FXR gene expression in mice.

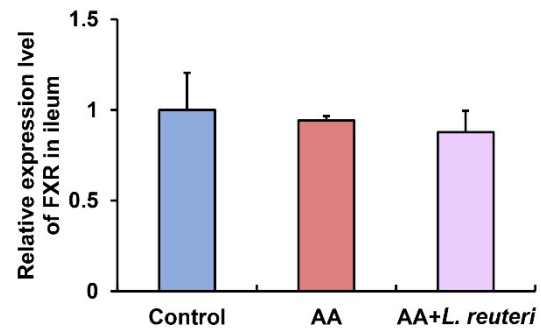

**Fig. S3** The effect of *L. reuteri* on ileum FXR gene expression in chronic low-dose AA-exposed mice.
